# Supplementary material
Source: PubMed Central journal article supplement (PMC3777443)

GCTM-5

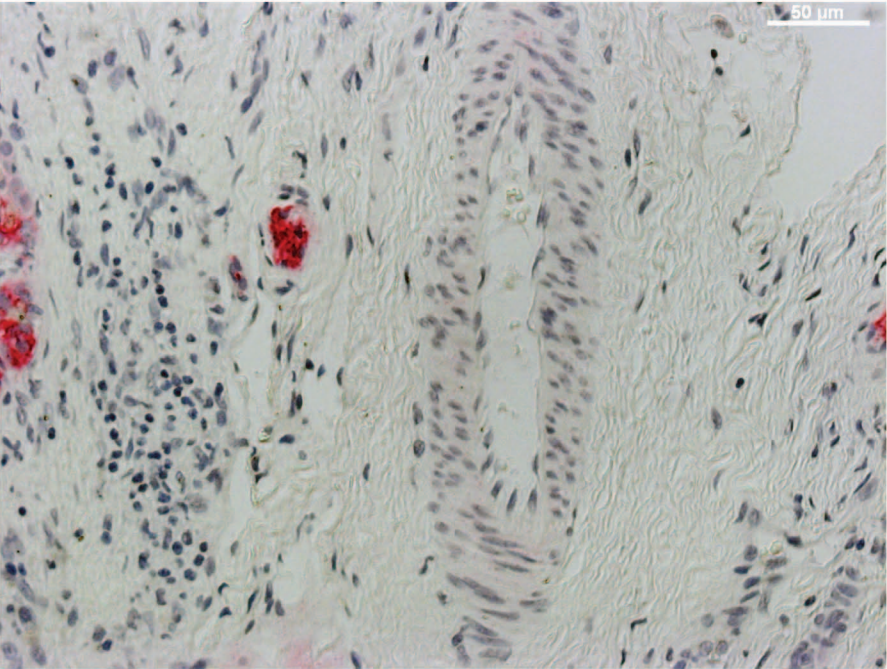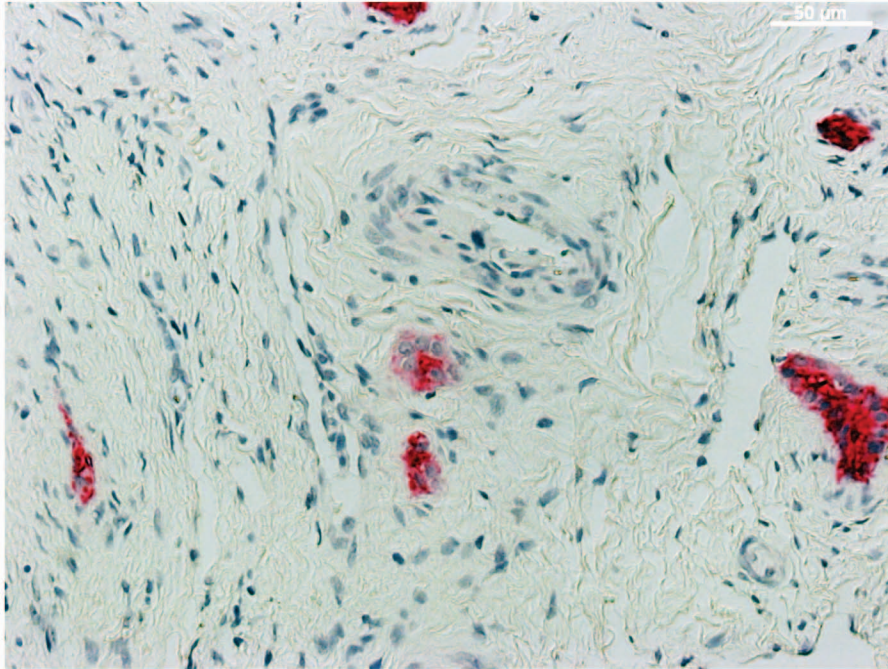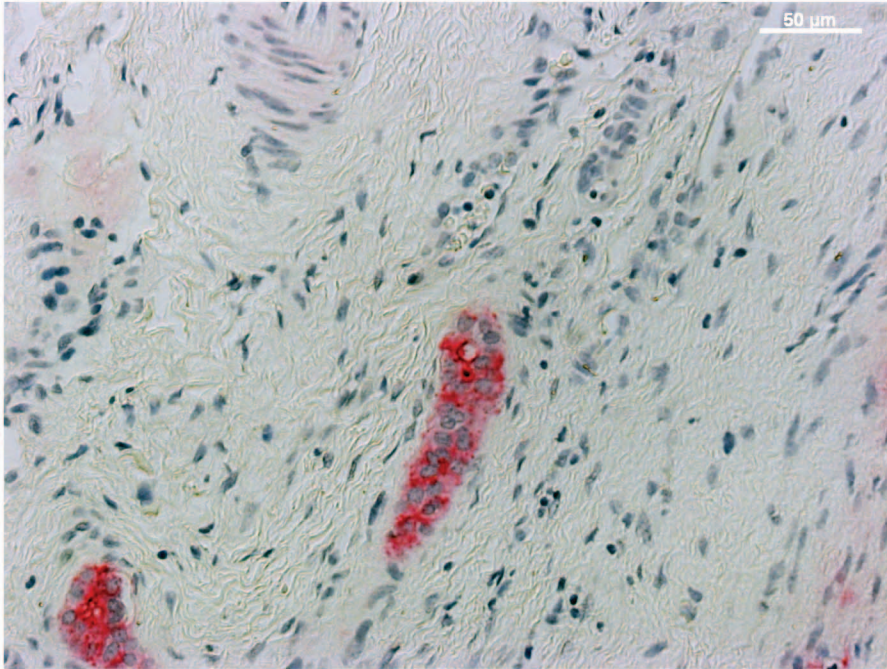

SOX-9

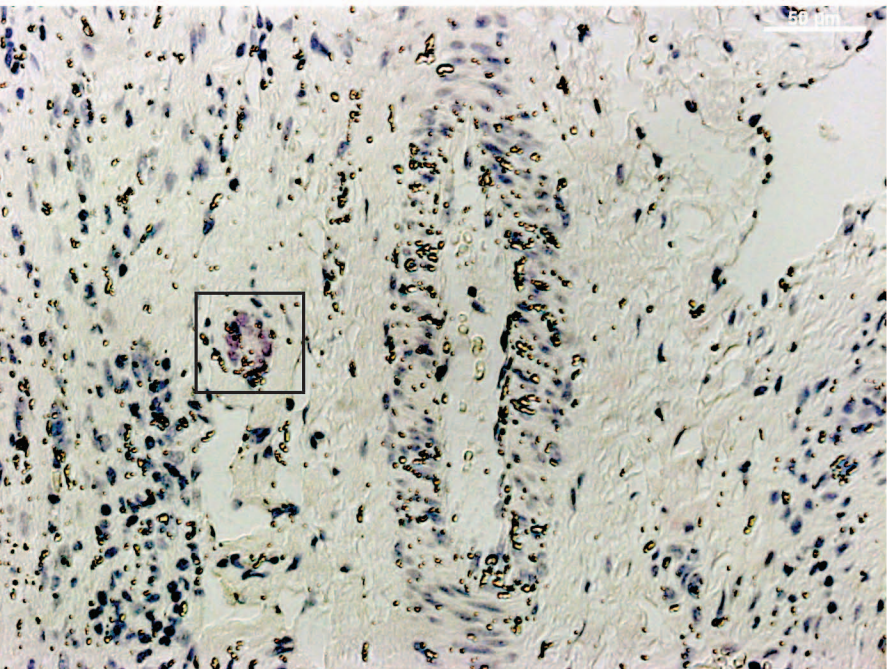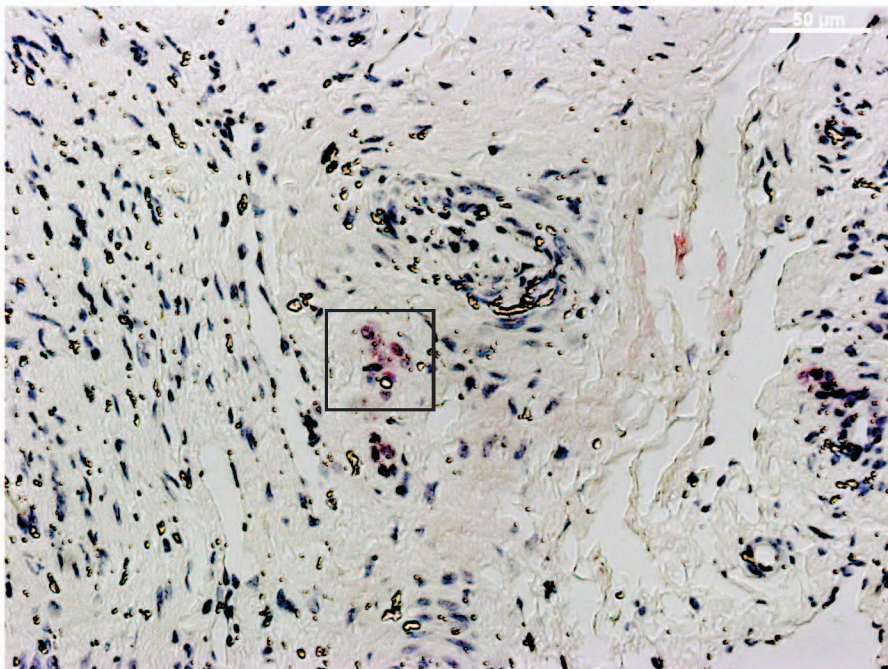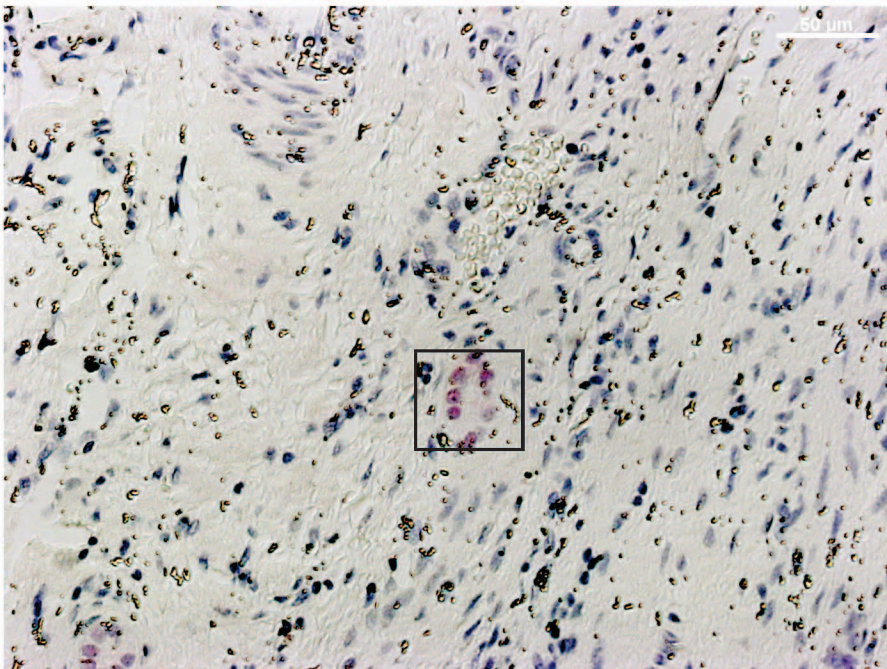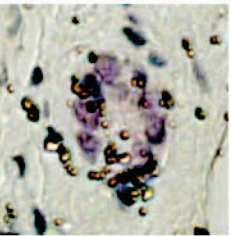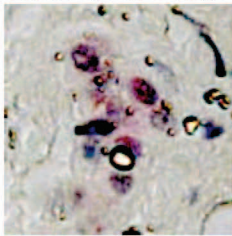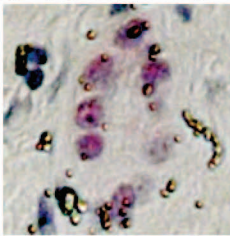

Supplement: NIHMS492532-supplement-supp_fig_6.pdf [file NIHMS492532-supplement-supp_fig_6.pdf]
